# Supplementary material for: Enhanced Luminol Chemiluminescence with Oxidase-like Activity of NiOOH/Ni(OH)2 Nanoflakes for the Sensitive Detection of Mn2+
Source: Research Square preprint supplement (doi:10.21203/rs.3.rs-6520640/v1), 2025-05-06
Supplement: Supplementary file 1 [file 89486e3d58b977f3479b2d12.docx]

**Table S1** Comparison of the constructed CL sensor based on NiOOH/Ni(OH)2 NFs with other reported methods for detecting Mn2+ in water samples.

| Materials | Methods | Linear range (μmol·L−1) | LOD (μmol·L−1) | Reference |
| --- | --- | --- | --- | --- |
| TCPP-GO a | Fluorescence | 25–270 | 1.80 | [1] |
| KBNCDs b | Fluorescence | 5–25 | 1.20 | [2] |
| NAC2 c | Fluorescence | 0–40 | 0.75 | [3] |
| ALC/PQ-2 d | Colorimetry | 0–40 | 6.95 | [4] |
| MNA-MA-AgNPs e | Surface-enhanced Raman Spectroscopy | 10–100 | 4.00 | [5] |
| NiOOH/Ni(OH)2 | Chemiluminescence | 1–30 | 0.60 | This work |

a Meso‑tetrakis(4-carboxyphenyl)porphyrin-graphene oxide

b Kentucky bluegrass nitrogen-doped carbon dots

c Naphthalimide derivatives with *n-*dodecyl[-(CH2)11CH3]

d alizarin complexone/ poly[bis(2-chloroethyl)ether-alt-1,3-bis[3-(dimethylamino)propyl]urea]

e 6-mercaptonicotinic acid-melamine-silver nanoparticles
