# Supplementary material for: Enhanced Luminol Chemiluminescence with Oxidase-like Activity of NiOOH/Ni(OH)2 Nanoflakes for the Sensitive Detection of Mn2+
Source: Research Square preprint supplement (doi:10.21203/rs.3.rs-6520640/v1), 2025-05-06
Supplement: Supplementary file 2 [file c9e38eeedfbe8c259cd7ea33.docx]

| Sample | Add (μmol·L−1) | Found (μmol·L−1, n=3) a | | | Recovery (%) | RSD (%) |
| --- | --- | --- | --- | --- | --- | --- |
| Tap water | 0 | | — | — | | — |
| 5 | | 4.85±0.12 | 96.92 | | 2.57 |
| 15 | | 15.43±0.20 | 102.86 | | 1.32 |
| 25 | | 24.73±0.40 | 98.94 | | 1.60 |
| Lake water | 0 | | — | — | | — |
| 5 | | 5.03±0.18 | 100.51 | | 3.58 |
| 15 | | 15.36±0.39 | 102.42 | | 2.54 |
| 25 | | 24.39±0.34 | 97.54 | | 1.38 |

**Table S2** Detection of Mn2+ in tap water and lake water

a Mean ± standard deviation (n=3)
